# Supplementary material for: A smart O2-generating nanocarrier optimizes drug transportation comprehensively for chemotherapy improving
Source: PubMed Central journal article supplement — Acta Pharm Sin B. 2021 May 7;11(11):3608–21. doi: 10.1016/j.apsb.2021.04.021 (PMC8642619; doi:10.1016/j.apsb.2021.04.021), 2021-05-07
Supplement: mmc1.pdf [file mmc1.pdf]

## Supporting Information for

### ORIGINAL ARTICLE

## A smart O<sub>2</sub>-generating nanocarrier optimizes drug transportation comprehensively for chemotherapy improving

Xiaojuan Zhang<sup>a,†</sup>, Chuanchuan He<sup>a,†</sup>, Yun Sun<sup>b</sup>, Xiaoguang Liu<sup>a</sup>, Yan Chen<sup>a</sup>, Chen Chen<sup>a</sup>, Ruicong Yan<sup>a</sup>, Ting Fan<sup>a</sup>, Tan Yang<sup>a</sup>, Yao Lu<sup>a</sup>, Jun Luo<sup>a,\*</sup>, Xiang Ma<sup>a,\*</sup>, Guangya Xiang<sup>a,\*</sup>

<sup>a</sup>*School of Pharmacy, Tongji Medical College, Huazhong University of Science and Technology, Wuhan 430030, China*

<sup>b</sup>*Institute of Traditional Chinese Medicine, Xinjiang Medical University, Urumqi 830011, China*

Received 19 January 2021; received in revised form 25 March 2021; accepted 29 March 2021

<sup>†</sup>These authors made equal contributions to this work.

\*Corresponding authors. Tel./fax: +86 21 83692793.

E-mail addresses: lawdream1975@mail.hust.edu.cn (Jun Luo), xiangma@hust.edu.cn (Xiang Ma), gyxiang1968@hotmail.com (Guangya Xiang).

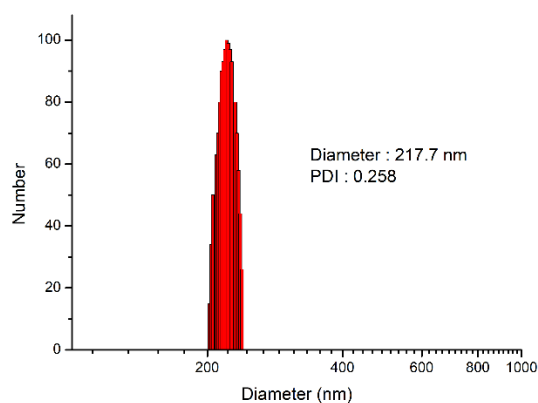

**Figure S1** DLS results of DOX-CaO<sub>2</sub>/MnO<sub>2</sub>-MS NPs in PBS.

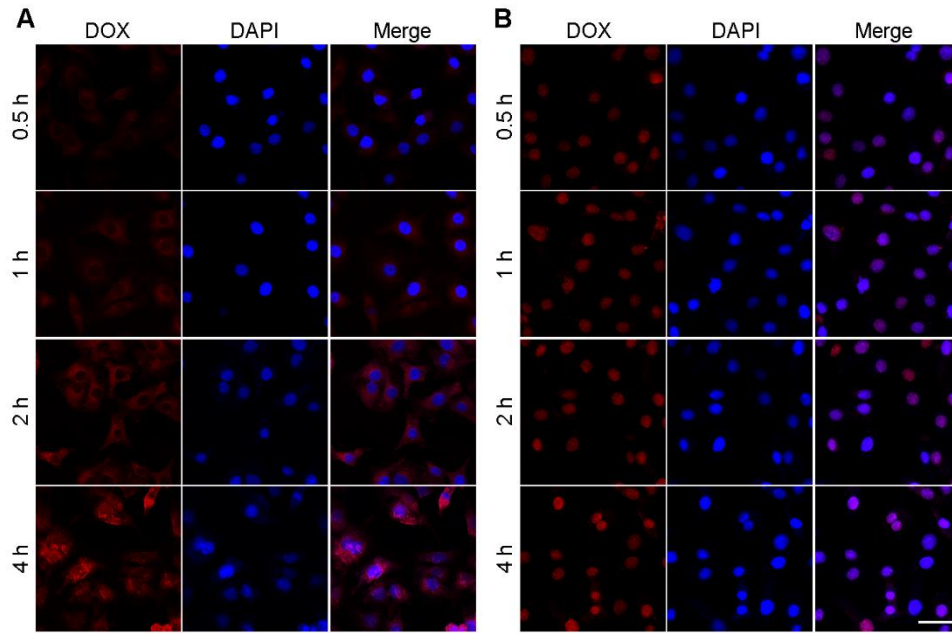

**Figure S2** Cellular uptake of DOX-CaO<sub>2</sub>/MnO<sub>2</sub>-MS NPs (A) and free DOX (B) in SKOV3 cells. Cell nuclei was stained with DAPI (blue fluorescence), DOX concentration: 1 μmol/L, scale bar=50 μm.

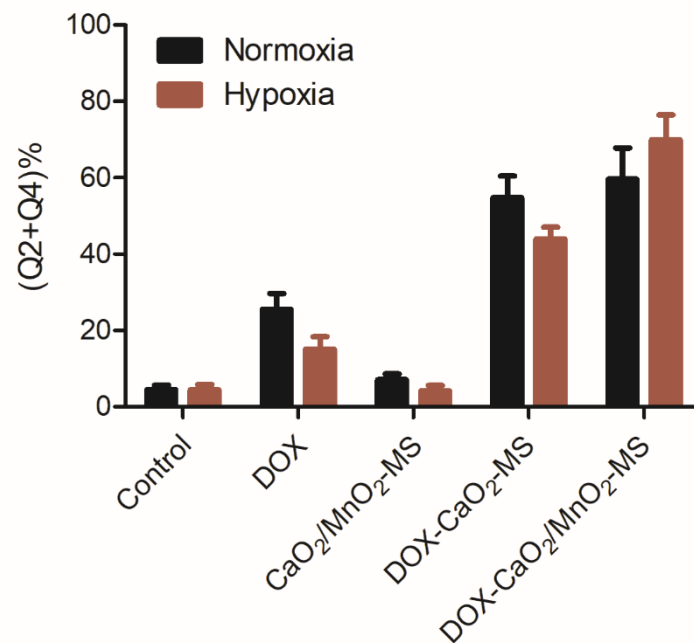

**Figure S3** The Annexin V-APC/7-AAD apoptosis assay of SKOV3 cells after the treatments under normoxia and hypoxia. DOX concentration: 4 μmol/L. Data are presented as mean±SD, *n*=3.

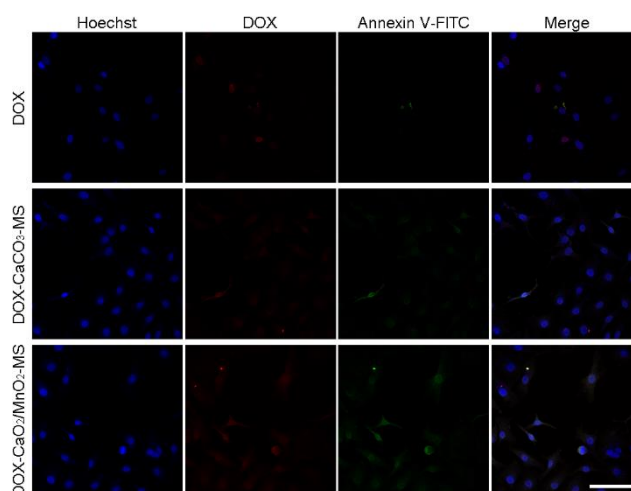

**Figure S4** SKOV3 cells were incubated with different groups (DOX concentration: 4  $\mu\text{mol/L}$ ) for 8 h. The neighboring effect was illustrated by coculturing infected cells with untreated cells at a 1:10 ratio for 24 h. The cell nuclei were stained with Hoechst 33342 (blue), apoptotic cells were detected by Annexin V-FITC (green); scale bar=200  $\mu\text{m}$ .

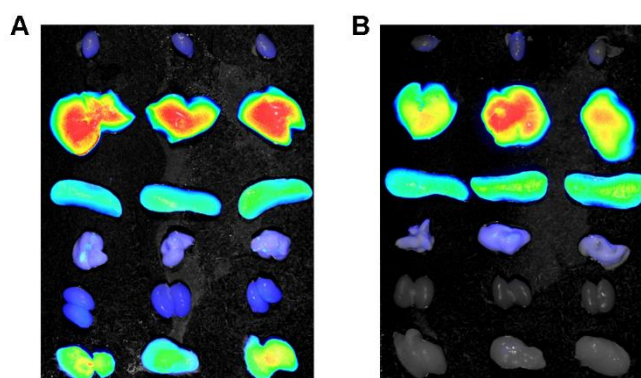

**Figure S5** *Ex vivo* fluorescence images after treatment with CaO<sub>2</sub>/MnO<sub>2</sub>-DiR/MS NPs (A) and free DiR (B) at 48 h post-injection. From up to bottom: heart, liver, spleen, lung, kidney, and tumor,  $n=3$ .

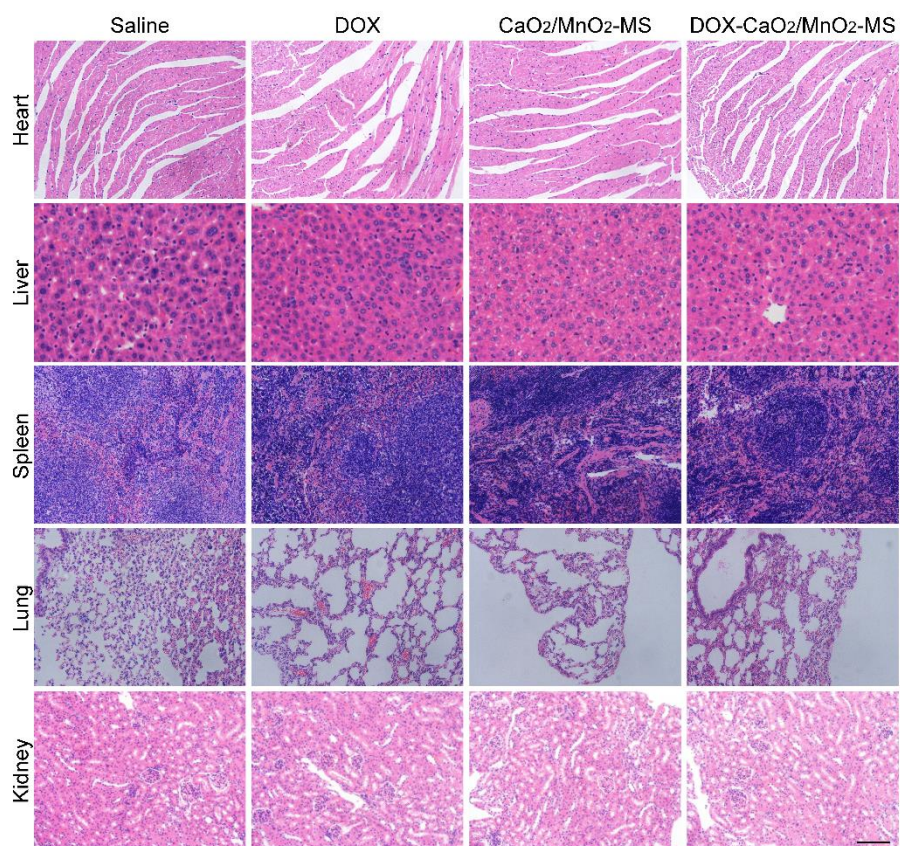

**Figure S6** H&E staining images of the normal tissues after treatment with saline, DOX, CaO<sub>2</sub>/MnO<sub>2</sub>-MS and DOX-CaO<sub>2</sub>/MnO<sub>2</sub>-MS NPs. Scale bar=200  $\mu$ m.
